# Supplementary material
Source: bioRxiv or medRxiv preprint supplement (https://www.biorxiv.org/highwire/filestream/129332/field_highwire_adjunct_files/0/430629-1.pdf)
Supplement: Supplementary file [file 430629-1.pdf]

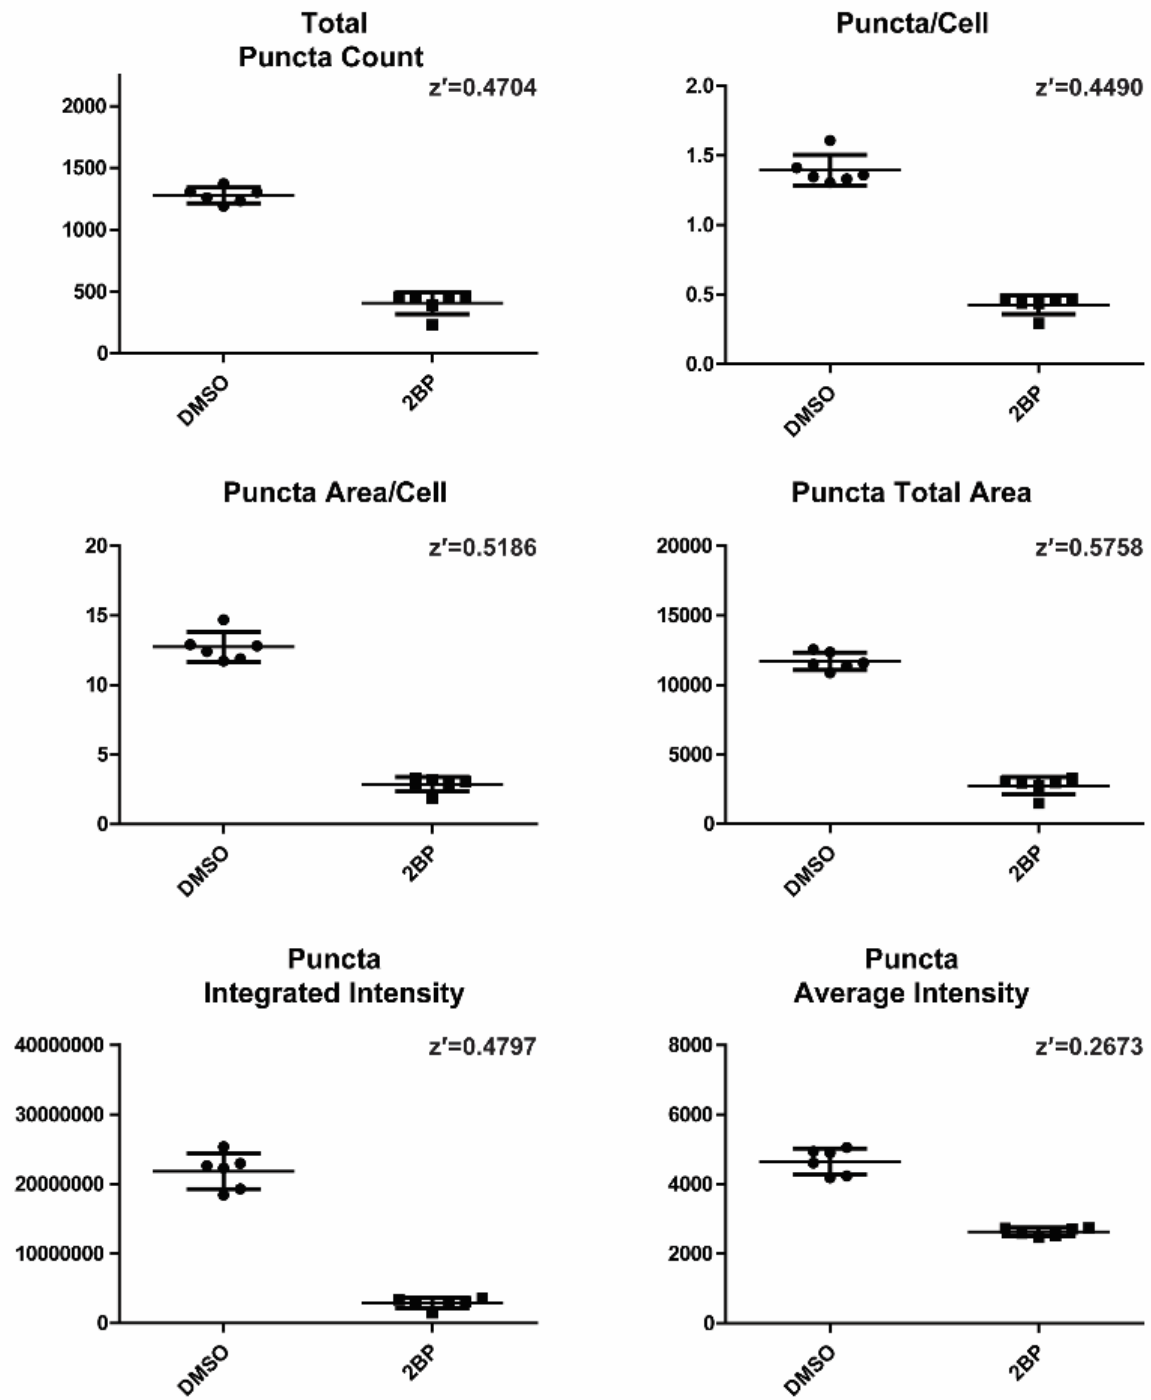

Martin *et al.*, Fig S1
